# Supplementary material for: Syntheses, structures, photoluminescence and magnetic properties of four-connected lanthanide–tricarboxylate coordination polymers
Source: Royal Society of Chemistry journal article supplement (doi:10.1039/c2ce26695d), 2012-11-27
Supplement: c2ce26695d.pdf [file c2ce26695d.pdf]

## Supporting Information

### Syntheses, Structures, Photoluminescence and Magnetic Properties of Four-connected Lanthanide-Tricarboxylate Coordination Polymers

Xiao-Qing Zhao<sup>b</sup>, Xu-Hui Liu,<sup>a</sup> Ji-Jing Li,<sup>a</sup> Bin Zhao<sup>\*,a</sup>

<sup>a</sup>Department of Chemistry, Key Laboratory of Advanced Energy Material Chemistry, MOE, and TKL of Metal and Molecule Based Material Chemistry, Nankai University, Tianjin 300071, China. E-mail: zhaobin@nankai.edu.cn

<sup>b</sup>College of Life and Basic Sciences, Sichuan Agricultural University, Ya'an 625014, China.

#### *Supporting figures*

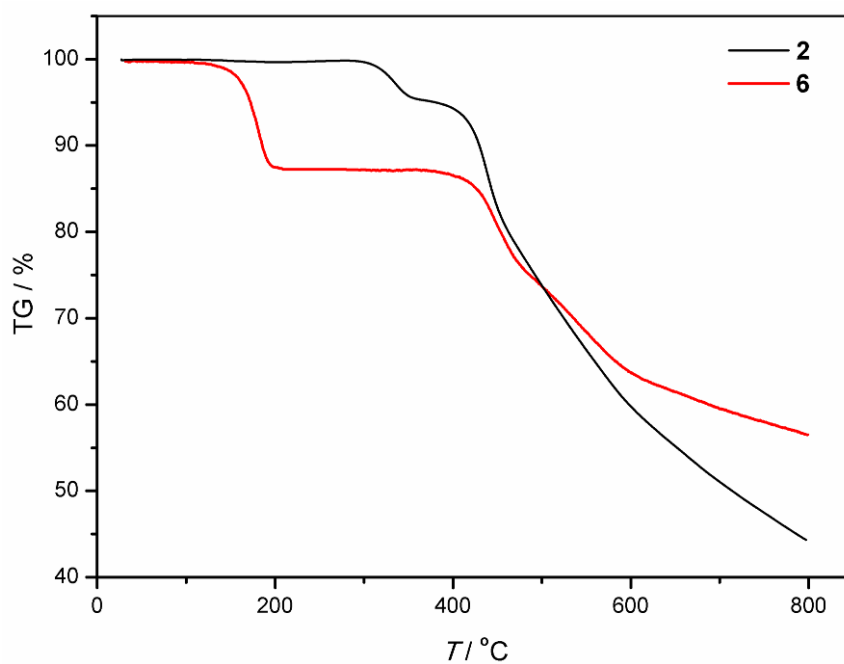

**Figure S1.** The TGA diagrams of **2** and **6**.

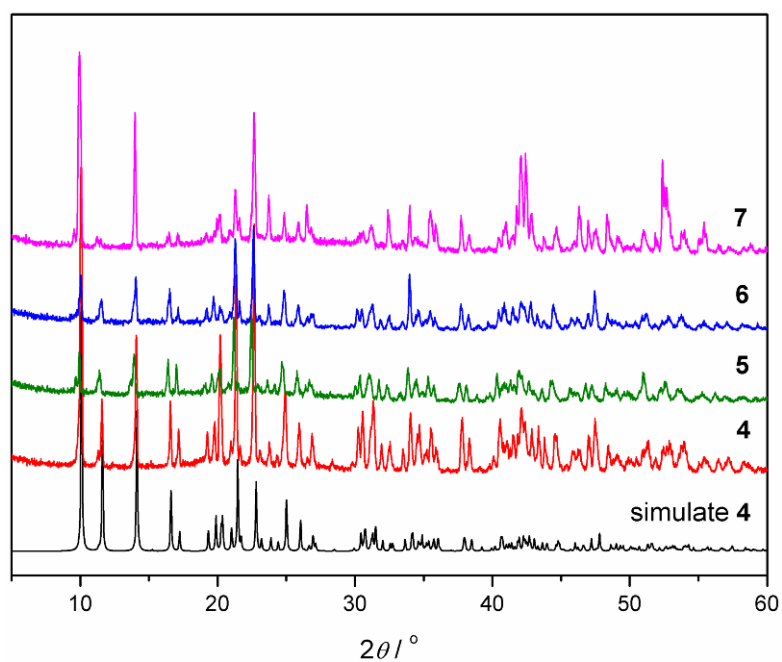

**Figure S2.** Experimental and theoretical X-ray powder diffraction patterns for 4-7.

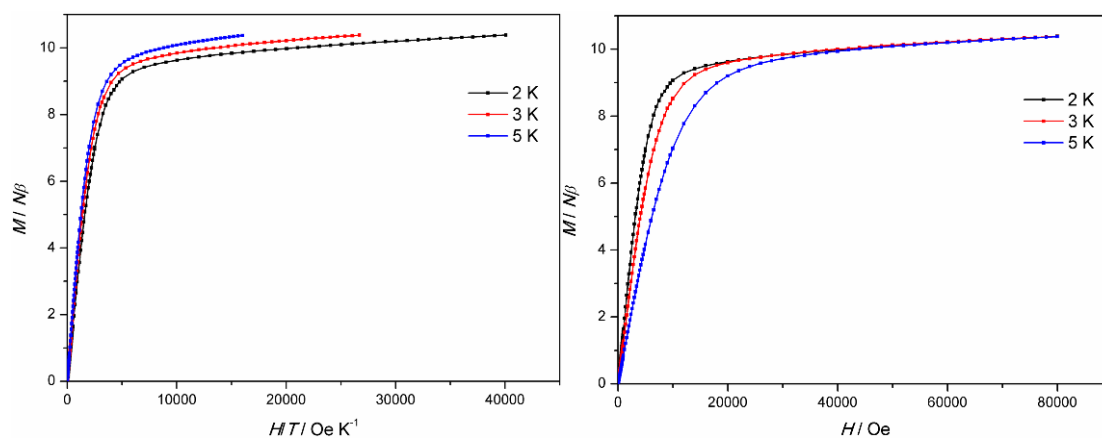

**Figure S3.** Field dependence of the magnetization for 6.
